# Supplementary material for: Selection signature analysis reveals genes underlying sheep milking performance
Source: Copernicus journal article supplement (doi:10.5194/aab-62-501-2019), 2019-08-08
Supplement: Supplementary file 1 [file Table S2 significant GO terms.xlsx]

## Sheet: Significant GO terms
Ontology	GO ID	Description	GeneRatio (267)	BgRatio (16708)	Pvalue	FDR	Gene Symbol
Cellular Component	GO:0005737	cytoplasm	173	8139	6.93218e-08	2.98084e-05	GCSH; SPAST; GTPBP4; AKAP6; PTK2B; CLU; DCTN3; DNAJA1; UBQLN1; CHGB; RAB11FIP5; DNAJC5; ATP1B3; MANBA; DYSF; PLS1; HTRA2; RPL23; RPL10A; RPL10; SNRPB; VPS16; HPS3; MAPRE1; RGS19; TEX261; BIRC6; SCOC; RHOA; PRKD1; STMN3; STRN3; UBAP1; XRN1; YIPF4; ATR; EI24; B4GALT1; PRNP; GKAP1; AP4S1; GALT; MRPS9; XDH; TRMT6; PITRM1; GLUD1; CHST2; RNF13; CLNS1A; PLOD2; SEMA4F; ARHGAP5; SELT; DDRGK1; BNIP3L; UBA5…
Cellular Component	GO:0005622	intracellular	215	11598	2.4822e-05	0.00432672	GCSH; DCTN1; BIRC6; CDC25B; SPAST; GTPBP4; AKAP6; PTK2B; CLU; DCTN3; DNAJA1; UBQLN1; CHGB; RAB11FIP5; PPP1CC; PRPF6; DUSP11; WWTR1; MAPRE1; TCEA2; MBNL1; BCL2L1; DCAF12; PCNA; FERMT1; DNAJC5; ATP1B3; MANBA; DYSF; DNAI1; PCGF1; HTRA2; FRMD3; RHOA; PFN2; SPEF1; DQX1; FHL2; PHF20; ADRA1A; STK38; RASEF; ALMS1; SPSB4; RDH12; PLCH1; RTKN; TRIM35; CCL21; MOBKL1B; EEF1A2; CCL19; PLS1; NOL6; SCFD1; RPL23;…
Cellular Component	GO:0044444	cytoplasmic part	120	5525	3.10996e-05	0.00432672	GCSH; SPAST; GTPBP4; AKAP6; PTK2B; CLU; DCTN3; DNAJA1; UBQLN1; CHGB; RAB11FIP5; DNAJC5; ATP1B3; MANBA; DYSF; PLS1; HTRA2; RPL23; RPL10A; RPL10; SNRPB; VPS16; HPS3; MAPRE1; RGS19; TEX261; BIRC6; SCOC; RHOA; PRKD1; STMN3; STRN3; UBAP1; XRN1; YIPF4; ATR; EI24; B4GALT1; PRNP; GKAP1; AP4S1; GALT; MRPS9; XDH; TRMT6; PITRM1; GLUD1; CHST2; RNF13; CLNS1A; PLOD2; SEMA4F; ARHGAP5; SELT; DDRGK1; BNIP3L; UBA5…
Cellular Component	GO:0044424	intracellular part	206	11021	4.02486e-05	0.00432672	GCSH; DCTN1; BIRC6; CDC25B; SPAST; GTPBP4; AKAP6; PTK2B; CLU; DCTN3; DNAJA1; UBQLN1; CHGB; RAB11FIP5; PPP1CC; PRPF6; DUSP11; WWTR1; MAPRE1; TCEA2; MBNL1; BCL2L1; DCAF12; PCNA; FERMT1; DNAJC5; ATP1B3; MANBA; DYSF; DNAI1; PCGF1; HTRA2; FRMD3; RHOA; PFN2; SPEF1; DQX1; FHL2; PHF20; ADRA1A; PLS1; NOL6; SCFD1; RPL23; RPL10A; RPL10; SNRPB; VPS16; SIGMAR1; HPS3; RGS19; TEX261; RNF7; SCOC; HMGB1; MED12L; …
Cellular Component	GO:0005829	cytosol	41	1363	6.11184e-05	0.00525618	RPL23; RPL10A; RPL10; HPS3; CCT7; CCT2; HTRA2; RAP2B; KCNAB1; UBAP1; HK2; TPRKB; SIAH2; GMPS; NLRC4; LARP4B; DCTN1; MEMO1; GBA3; FERMT1; PRKD1; PANK2; CHMP5; ATP6V1B1; EPHX2; SNRPB; OPRL1; PLCH1; DPYSL2; HMGB1; CLU; AGTR1; RHOA; XDH; BCL2L1; MTHFD2; CLNS1A; DGUOK; ARFRP1; TRPC1; DNAJA1
Cellular Component	GO:0009898	cytoplasmic side of plasma membrane	9	130	0.000242942	0.0174108	HTRA2; ACP1; RASA2; KCNAB1; PTK6; TGM3; PTK2B; SRMS; RHOA
Cellular Component	GO:0098562	cytoplasmic side of membrane	9	140	0.000420899	0.0258552	HTRA2; ACP1; RASA2; KCNAB1; PTK6; TGM3; PTK2B; SRMS; RHOA
Cellular Component	GO:0043227	membrane-bounded organelle	178	9502	0.000615865	0.0331027	CHGB; RAB11FIP5; PPP1CC; PRPF6; DUSP11; DNAJC5; ATP1B3; MANBA; DYSF; PCGF1; PCNA; DQX1; SPAST; PHF20; ADRA1A; GTPBP4; AKAP6; NOL6; SCFD1; HTRA2; VPS16; UBQLN1; SNRPB; TEX261; BIRC6; SCOC; RHOA; MED12L; STMN3; STRN3; UBAP1; XRN1; YIPF4; MAPRE1; ATR; EI24; B4GALT1; PRNP; GKAP1; AP4S1; GALT; CLU; MRPS9; XDH; PLCH1; NFX1; RRP36; NPAS3; LARP4B; APTX; RPL23; PNMA2; PA2G4; RPL10A; PITRM1; GLUD1; UBOX5; …
Cellular Component	GO:0043231	intracellular membrane-bounded organelle	161	8447	0.000791823	0.0378315	CHGB; RAB11FIP5; PPP1CC; PRPF6; DUSP11; DNAJC5; ATP1B3; MANBA; DYSF; PCGF1; PCNA; DQX1; SPAST; PHF20; ADRA1A; GTPBP4; AKAP6; NOL6; SCFD1; HTRA2; VPS16; UBQLN1; SNRPB; TEX261; BIRC6; SCOC; RHOA; MED12L; STMN3; STRN3; UBAP1; XRN1; YIPF4; MAPRE1; ATR; EI24; B4GALT1; PRNP; GKAP1; AP4S1; GALT; CLU; MRPS9; XDH; PLCH1; NFX1; RRP36; NPAS3; LARP4B; APTX; RPL23; PNMA2; PA2G4; RPL10A; PITRM1; GLUD1; UBOX5; …
Cellular Component	GO:0043229	intracellular organelle	177	9505	0.000975664	0.0419536	DCTN1; BIRC6; CDC25B; CHGB; RAB11FIP5; PPP1CC; PRPF6; DUSP11; SPAST; MAPRE1; TCEA2; MBNL1; BCL2L1; DCTN3; DCAF12; PCNA; FERMT1; DNAJC5; ATP1B3; MANBA; DYSF; DNAI1; PCGF1; HTRA2; FRMD3; PTK2B; RHOA; PFN2; SPEF1; DQX1; FHL2; PHF20; ADRA1A; GTPBP4; AKAP6; PLS1; NOL6; SCFD1; RPL23; RPL10A; RPL10; VPS16; UBQLN1; SIGMAR1; SNRPB; RGS19; TEX261; SCOC; HMGB1; MED12L; STMN3; STRN3; UBAP1; XRN1; YIPF4; ATR;…
Molecular Function	GO:0001608	G-protein coupled nucleotide receptor activity	4	14	6.37007e-05	0.0226774	P2RY12; P2RY1; P2RY14; GPR171
Molecular Function	GO:0045028	G-protein coupled purinergic nucleotide receptor activity	4	14	6.37007e-05	0.0226774	P2RY12; P2RY1; P2RY14; GPR171
