# Supplementary material for: Selection signature analysis reveals genes underlying sheep milking performance
Source: Copernicus journal article supplement (doi:10.5194/aab-62-501-2019), 2019-08-08
Supplement: Supplementary file [file aab-62-501-2019-supplement-title-page.pdf › aab-62-501-2019-supplement-title-page.pdf]

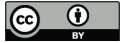

## *Supplement of*

# **Selection signature analysis reveals genes underlying sheep milking performance**

**Zehu Yuan et al.**

*Correspondence to:* Fadi Li (lifd@lzu.edu.cn) and Xiangpeng Yue (lexp@lzu.edu.cn)

- [aab-62-501-2019-supplement-title-page.pdf](#)
- AdditionalFiles
  - [FigureS1.tif](#)
  - [Table S2 significant GO terms.xlsx](#)
  - [table S1.docx](#)

The copyright of individual parts of the supplement might differ from the CC BY 4.0 License.
